# Supplementary material for: Mechanistic evidence of Passiflora edulis (Passifloraceae) anxiolytic activity in relation to its metabolite fingerprint as revealed via LC-MS and chemometrics
Source: Royal Society of Chemistry journal article supplement (doi:10.1039/c5fo00875a), 2015-01-01
Supplement: c5fo00875a1.pdf [file c5fo00875a1.pdf]

### Supplementary files

**Suppl. Table 1** Effects of administration of ethanolic extract of *Passiflora edulis* and its fractions on the percentages of open arms entries (%OE) and time spent in open arms (%OT) displayed by mice in the elevated plus-maze. (EE) ethanolic extract, (CHF) chloroform, (EAF) ethyl acetate, (BF) butanol (DZ) diazepam. Data are expressed as mean  $\pm$  S.E.M. (n = 5).  $P \leq 0.05$ , compared with control groups (one-way ANOVA followed by Least Significant Difference test (LSD test)).

| Treatment | Dose (mg/kg) | %OE              | %OT              |
|-----------|--------------|------------------|------------------|
| Vehicle   | 10 ml/kg     | 31.01 $\pm$ 0.24 | 25.90 $\pm$ 4.41 |
| EE        | 200          | 39.99 $\pm$ 3.20 | 29.36 $\pm$ 3.95 |
| EE        | 400          | 42.62 $\pm$ 5.19 | 33.16 $\pm$ 9.96 |
| CHF       | 200          | 42.18 $\pm$ 3.79 | 28.88 $\pm$ 5.93 |
| EAF       | 200          | 44.09 $\pm$ 3.60 | 30.53 $\pm$ 3.78 |
| BF        | 200          | 45.45 $\pm$ 5.34 | 31.05 $\pm$ 5.00 |
| DZ        | 2            | 45.81 $\pm$ 4.37 | 49.69 $\pm$ 8.09 |

**Suppl. Table 2** Quantification of major flavonoids identified in *P. edulis* crude methanol extract. Values are expressed as  $\mu\text{g}/\text{mg}$  plant dry wt. from 3 biological replicates. Peak numbers follow that listed in Table 1.

| Peak number | Flavonoid                                            | Average | Std. dev. |
|-------------|------------------------------------------------------|---------|-----------|
| 3           | Luteolin-6,8-C-di-glucoside (Lucenin-2)              | 7.4     | 1.0       |
| 5           | Apigenin-6,8-C-di-glucoside (Vicenin-2)              | 13.2    | 0.4       |
| 9           | Apigenin-6-C-glucoside-8-C-arabinoside (Schaftoside) | 15.6    | 3.2       |
| 10          | Luteolin-8-C-glucoside (Orientin)                    | 22.8    | 3.0       |
| 11          | Chrysin-6,8-C-di-hexoside                            | 33.1    | 2.1       |
| 12          | Apigenin-6-C-glucoside (Isovitexin)                  | 7.3     | 0.5       |
| 18          | Chrysin-C-hexoside-O-deoxyhexoside                   | 13.6    | 0.6       |
| 19          | Luteolin-8-C-deoxyhexoside                           | 3.2     | 0.3       |

## Supplementary Figures

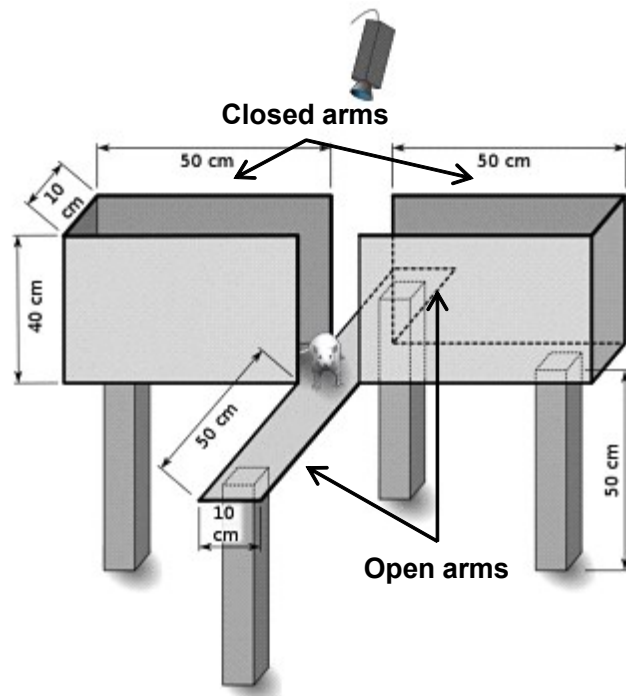

**Suppl. Fig. 1S** Schematic drawing of the Elevated Plus-Maze setup. The elevated plus-maze consists of two open arms and two enclosed arms extending from a central platform and arranged so that two pairs of identical arms were opposite to each other, the apparatus was raised to a height of 50 cm above floor level.

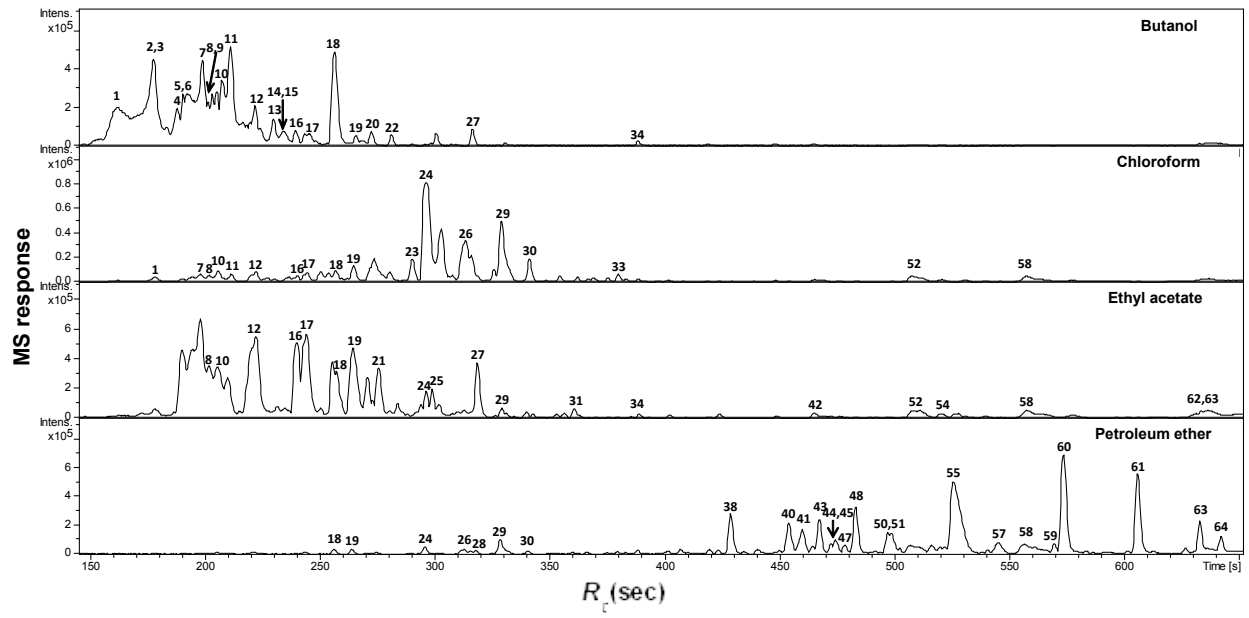

**Suppl. Fig. 2S** UPLC Chromatograms of *P. edulis* fractions (butanol, chloroform, ethyl acetate, and petroleum ether).
